# Supplementary material for: Effects of High Temperature-Triggered Transcriptomics on the Physiological Adaptability of Cenococcum geophilum, an Ectomycorrhizal Fungus
Source: MDPI journal article supplement (doi:10.3390/microorganisms10102039), 2022-10-15
Supplement: s1 [file s1]

**Table S1.** Six *Cenococcum geophilum* isolates were collected at sites and hosts.

| Isolate | Location                 | Host                |
|---------|--------------------------|---------------------|
| ACg07   | Florida, USA             | Pinus elliotii      |
| ChCg028 | Hainan Province, China   | Eucalyptus          |
| ChCg100 | Shenyang Province, China | Pinus tabulaeformis |
| ChCg001 | Yunnan Province, China   | Pinus yunnanensis   |
| JaCg144 | New Island, Japan        | Pinus thunbergii    |
| JaCg202 | Mount Fuji, Japan        | Salix reinii        |

**Table S2.** Primer sequences used in this study.

| Gene ID                  | F-primers(5'→3')           | R-primers(5'→3')        |
|--------------------------|----------------------------|-------------------------|
| 18S rRNA(Reference gene) | CGGGTAACGGGGAATTAGGG       | CACCAGACTTGCCCTCCAAT    |
| K441DRAFT_643842         | GCAGGCCATTCTCTGTACAATTC    | AAGTAGTCGATCAGTACGTGAGC |
| K441DRAFT_695880         | AGTATTGGTGGTTTGGTCCTCTC    | GTACTAGCGGAAGACCATCTCTG |
| K441DRAFT_672389         | CCATCAGTTCCTGGCTTTTGTGAG   | CGCCAATCTCTGTCATATCTCCA |
| K441DRAFT_663665         | GGTTGGAGATAGAGTTGGCGTTA    | GTATTGTTGGAATGTGCCTGGAG |
| K441DRAFT_693545         | TATGTCAGCCACCTCTATCAACG    | TACCAAACGTTCCAAGAGTAGGG |
| K441DRAFT_702334         | CTGATGATGTTGTCGTAACCTGC    | GCAATGTCTTCAACGAGAGATGG |
| K441DRAFT_687784         | GAACGAAACCTCATACAAGCA<br>C | GTAGATGAGGATTGGGATAGGCG |
| K441DRAFT_552345         | GATGGGGAGATCTCATTCTGTGG    | ATGGGAGATTTCATACCGAGCTG |
| K441DRAFT_618447         | ATCCTACAGTTTCTCTGAGCCC     | GCCATGTCTAAATCAATCTCCGC |

**Table S3.** Statistical table for *Cenococcum geophilum* sequencing data evaluation

|         | Clean Reads   | Clean Bases      | Total Reads   | Mapped Reads        | GC(%) | Q20(%) | Q30(%) |
|---------|---------------|------------------|---------------|---------------------|-------|--------|--------|
| A07CK1  | 25,139,859.00 | 7,541,957,700.00 | 50,279,718.00 | 25,243,398 (50.21%) | 51.51 | 97.93  | 94.08  |
| A07CK2  | 22,737,840.00 | 6,821,352,000.00 | 45,475,680.00 | 22,833,547 (50.21%) | 51.45 | 97.89  | 93.99  |
| A07HT1  | 21,964,790.00 | 6,589,437,000.00 | 43,929,580.00 | 22,059,927 (50.22%) | 51.54 | 97.78  | 93.62  |
| A07HT2  | 23,849,305.00 | 7,154,791,500.00 | 47,698,610.00 | 24,911,752 (52.23%) | 51.51 | 98.02  | 94.31  |
| C28CK1  | 25,098,768.00 | 7,529,630,400.00 | 50,197,536.00 | 25,206,539 (50.21%) | 51.49 | 98.26  | 94.18  |
| C28CK2  | 23,153,862.00 | 6,946,158,600.00 | 46,307,724.00 | 23,277,185 (50.27%) | 51.49 | 97.68  | 94.44  |
| C28HT1  | 20,743,503.00 | 6,223,050,900.00 | 41,487,006.00 | 21,667,655 (52.23%) | 51.52 | 98.18  | 94.42  |
| C28HT2  | 23,684,580.00 | 7,105,374,000.00 | 47,369,160.00 | 23,790,997 (50.22%) | 51.57 | 98.14  | 94.38  |
| C100CK1 | 21,023,655.00 | 6,307,096,500.00 | 42,047,310.00 | 21,899,406 (52.08%) | 51.58 | 98.09  | 94.29  |
| C100CK2 | 20,890,787.00 | 6,267,236,100.00 | 41,781,574.00 | 21,709,959 (51.96%) | 51.6  | 98.23  | 94.63  |
| C100HT1 | 22,256,257.00 | 6,676,877,100.00 | 44,512,514.00 | 24,177,502 (54.32%) | 51.54 | 98.25  | 94.71  |
| C100HT2 | 21,243,415.00 | 6,373,024,500.00 | 42,486,830.00 | 23,348,508 (54.95%) | 51.58 | 98.16  | 94.47  |
| C01CK1  | 23,648,022.00 | 7,094,406,600.00 | 47,296,044.00 | 22,924,112 (48.47%) | 51.67 | 98     | 94.75  |
| C01CK2  | 24,317,503.00 | 7,295,250,900.00 | 48,635,006.00 | 23,436,384 (48.19%) | 51.68 | 98.12  | 92.94  |

|         |               |                  |               |                     |       |       |       |
|---------|---------------|------------------|---------------|---------------------|-------|-------|-------|
| C01HT1  | 25,480,913.00 | 7,644,273,900.00 | 50,961,826.00 | 23,907,539 (46.91%) | 51.47 | 98.08 | 94.6  |
| C01HT2  | 24,950,256.00 | 7,485,076,800.00 | 49,900,512.00 | 23,795,110 (47.69%) | 51.51 | 98.07 | 94.45 |
| J144CK1 | 27,735,567.00 | 8,320,670,100.00 | 55,471,134.00 | 28,461,437 (51.31%) | 51.43 | 98.11 | 94.42 |
| J144CK2 | 24,710,710.00 | 7,413,213,000.00 | 49,421,420.00 | 25,159,857 (50.91%) | 51.43 | 98.23 | 94.68 |
| J144HT1 | 22,023,053.00 | 6,606,915,900.00 | 44,046,106.00 | 21,411,848 (48.61%) | 51.5  | 97.47 | 92.61 |
| J144HT2 | 28,996,295.00 | 8,698,888,500.00 | 57,992,590.00 | 28,872,587 (49.79%) | 51.28 | 98.05 | 94.31 |
| J202CK1 | 27,379,922.00 | 8,213,976,600.00 | 54,759,844.00 | 28,944,184 (52.86%) | 51.44 | 98.1  | 94.35 |
| J202CK2 | 26,680,293.00 | 8,004,087,900.00 | 53,360,586.00 | 28,323,485 (53.08%) | 51.45 | 98.19 | 94.51 |
| J202HT1 | 26,953,787.00 | 8,086,136,100.00 | 53,907,574.00 | 28,512,771 (52.89%) | 51.49 | 98.19 | 94.56 |
| J202HT2 | 21,984,601.00 | 6,595,380,300.00 | 43,969,202.00 | 18,655,039 (42.43%) | 52.22 | 97.4  | 92.32 |

---

Clean Reads refers to the total number of pair-end Reads in Clean Data; Clean Bases (bp) refers to the total number of bases in Clean Data; Total Reads refers to the total number of single-ended Reads in Clean Data; Mapped Reads: The number of Reads paired to the reference genome and the percentage of Clean Reads; GC (%) refers to the percentage of G and C bases in Clean Data to the total bases; Q20 (%) refers to the Clean Data quality value Percentage of bases greater than or equal to 20; Q30 (%) refers to the Clean Data quality value Percentage of bases greater than or equal to 30.

**Supplementary Table S4** The Pearson's correlation of gene expression levels between samples

[illegible]

|        |       |       |        |        |       |       |       |       |        |        |        |        |       |       |       |       |       |       |        |        |       |       |        |   |
|--------|-------|-------|--------|--------|-------|-------|-------|-------|--------|--------|--------|--------|-------|-------|-------|-------|-------|-------|--------|--------|-------|-------|--------|---|
| C28h1  | .771* | .791* | .787** | .785** | .649* | .716* | .564* | .595* | .735** | .722** | .747** | .749** | .785* | .958* | 1     |       |       |       |        |        |       |       |        |   |
| C28h2  | .796* | .800* | .820** | .803** | .631* | .694* | .580* | .590* | .720** | .701** | .731** | .742** | .746* | .890* | .945* | 1     |       |       |        |        |       |       |        |   |
| J144c1 | .751* | .761* | .753** | .756** | .719* | .765* | .597* | .635* | .802** | .807** | .773** | .758** | .641* | .712* | .706* | .695* | 1     |       |        |        |       |       |        |   |
| J144c2 | .753* | .757* | .754** | .756** | .742* | .798* | .629* | .671* | .828** | .821** | .807** | .794** | .646* | .709* | .715* | .706* | .970* | 1     |        |        |       |       |        |   |
| J144h1 | .723* | .725* | .725** | .725** | .664* | .712* | .549* | .584* | .738** | .734** | .721** | .707** | .588* | .642* | .659* | .686* | .959* | .945* | 1      |        |       |       |        |   |
| J144h2 | .730* | .739* | .733** | .734** | .682* | .736* | .559* | .605* | .779** | .771** | .766** | .745** | .603* | .669* | .685* | .691* | .972* | .964* | .986** | 1      |       |       |        |   |
| J202c1 | .690* | .697* | .702** | .689** | .650* | .708* | .615* | .644* | .804** | .773** | .810** | .808** | .594* | .652* | .697* | .721* | .733* | .761* | .706** | .735** | 1     |       |        |   |
| J202c2 | .692* | .708* | .709** | .708** | .664* | .736* | .587* | .643* | .813** | .786** | .800** | .792** | .599* | .681* | .707* | .681* | .776* | .792* | .740** | .774** | .932* | 1     |        |   |
| J202h1 | .734* | .737* | .752** | .742** | .654* | .725* | .621* | .659* | .820** | .784** | .825** | .825** | .608* | .677* | .725* | .765* | .766* | .787* | .758** | .779** | .954* | .952* | 1      |   |
| J202h2 | .699* | .687* | .702** | .696** | .655* | .711* | .696* | .706* | .773** | .737** | .797** | .816** | .584* | .627* | .678* | .703* | .700* | .730* | .701** | .703** | .895* | .830* | .894** | 1 |

\*\* at.01 level (two-tailed), significant correlation

“c” represents each isolate at 25°C; “h” represents each isolate at 30°C. The Pearson correlation coefficient was made using SPSS 22.0. \*\*  $P < 0.01$ .

**Table S5** Differentially expressed genes in the significantly enriched pathway of *Cenococcum geophilum* at high temperature against control

| GeneID           | Annotation    | P value     | Log2 FC      | Regulated | Comparison group |
|------------------|---------------|-------------|--------------|-----------|------------------|
| K441DRAFT_663665 | ABC transport | 0.001186983 | -0.820903542 | down      | C28CK vs C28HT   |
| K441DRAFT_643842 | ABC transport | 7.81E-19    | -0.885496349 | down      | A07CK vs A07HT   |
| K441DRAFT_695880 | ABC transport | 4.26038E-11 | -0.915315062 | down      | A07CK vs A07HT   |
| K441DRAFT_587262 | ABC transport | 5.78E-05    | 0.607204749  | up        | C100CK vs C100HT |
| K441DRAFT_702334 | ABC transport | 1.18E-08    | 0.841453895  | up        | C100CK vs C100HT |
| K441DRAFT_672389 | ABC transport | 0.001044313 | -0.957545369 | down      | C28CK vs C28HT   |

|                  |                                         |             |              |      |                   |
|------------------|-----------------------------------------|-------------|--------------|------|-------------------|
|                  |                                         | 0.000282605 | -1.063971035 | down | C01CK vs C01HT    |
| K441DRAFT_618447 | fatty acid degradation                  | 8.82623E-11 | -1.22978367  | down | J144CK vs J1441HT |
|                  |                                         | 6.80E-05    | -0.914747731 | down | J202CK vs J202HT  |
| K441DRAFT_36643  | glyoxylate and dicarboxylate metabolism | 0.000459623 | -0.715117814 | down | C01CK vs C01HT    |
| K441DRAFT_552345 | glyoxylate and dicarboxylate metabolism | 0.001012355 | -0.910459483 | down | C01CK vs C01HT    |
|                  |                                         | 0.000252193 | -0.713656958 | down | J202CK vs J202HT  |
| K441DRAFT_656597 | glyoxylate and dicarboxylate metabolism | 3.96E-05    | -0.745311418 | down | C01CK vs C01HT    |
| K441DRAFT_660528 | glyoxylate and dicarboxylate metabolism | 0.000357651 | -0.746615528 | down | C01CK vs C01HT    |
| K441DRAFT_687784 | glyoxylate and dicarboxylate metabolism | 1.72E-16    | -0.914159343 | down | J144CK vs J1441HT |
| K441DRAFT_681866 | glyoxylate and dicarboxylate metabolism | 0.004431583 | 0.609468918  | up   | C01CK vs C01HT    |
| K441DRAFT_662130 | glyoxylate and dicarboxylate metabolism | 3.26E-07    | -0.792205572 | down | A07CK vs A07HT    |
| K441DRAFT_638933 | glyoxylate and dicarboxylate metabolism | 0.00220095  | 0.597569712  | up   | C28CK vs C28HT    |
|                  |                                         | 1.03E-13    | -0.658163691 | down | A07CK vs A07HT    |
| K441DRAFT_574455 | glyoxylate and dicarboxylate metabolism | 0.001351191 | 0.853710593  | up   | C100CK vs C100HT  |
|                  |                                         | 1.14E-05    | 0.876157225  | up   | J202CK vs J202HT  |
| K441DRAFT_606325 | glyoxylate and dicarboxylate metabolism | 0.005822254 | -0.784910181 | down | C28CK vs C28HT    |

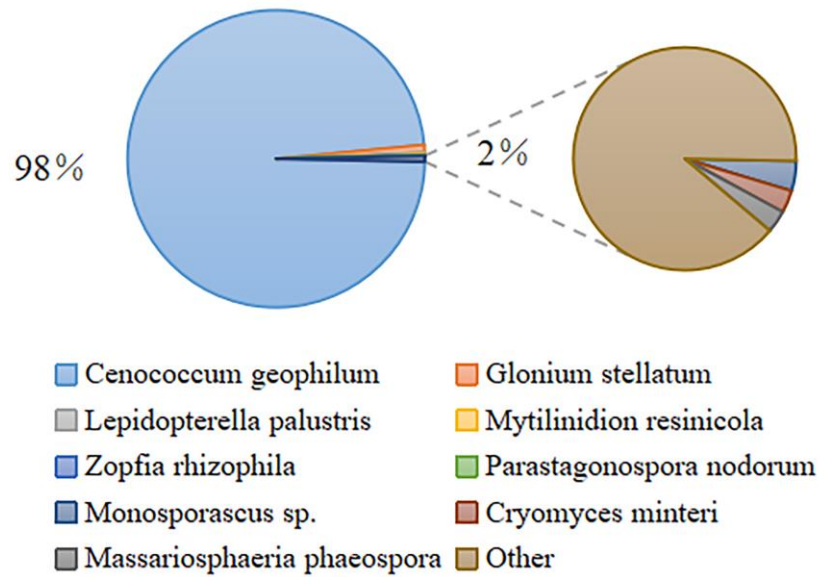

Figure S1. Gene species distribution map

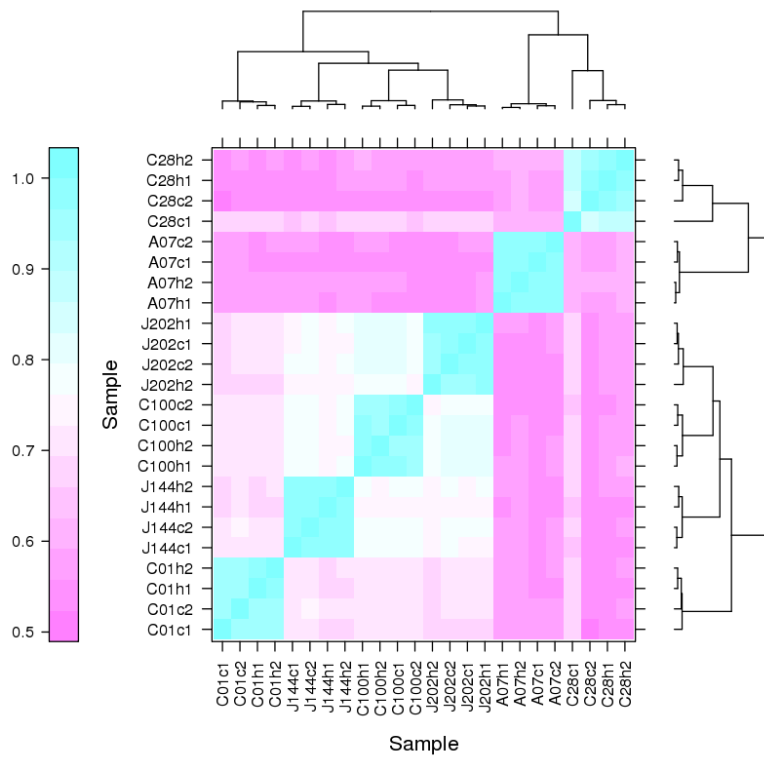

Figure S2. Replicated correlation heatmap

“c” represents each isolate at 25°C; “h” represents each isolate at 30°C; “1” and “2” represent two biological

repeats of each genotype *Cenococcum geophilum*

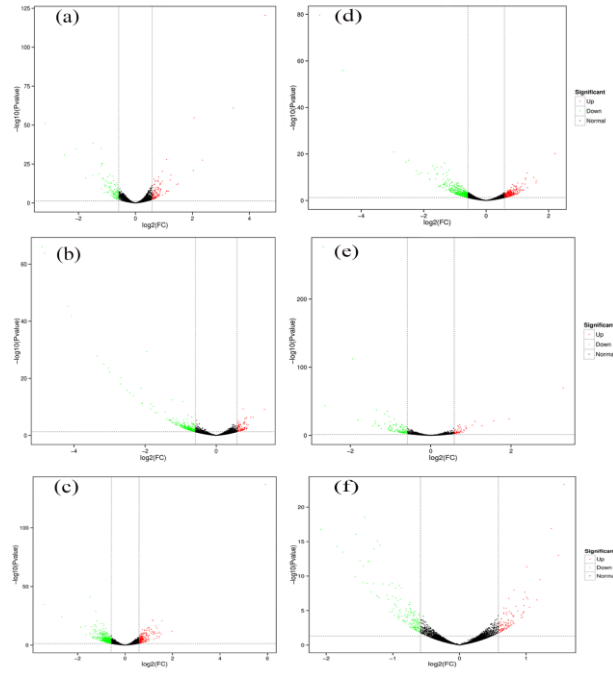

Figure S3. Volcano plot of DEGs between tolerant and sensitive six *Cenococcum geophilum* isolates under temperature stress.

The green dots in the figure represent down-regulated differentially expressed genes, the red dots represent up-regulated differentially expressed genes, and the black dots represent non-differentially expressed genes. (a)ACg07 ,(b)ChCg28,(c)ChCg100, (d)ChCg01, (e)JaCg144,(f)JaCg202. “CK” represents each isolate at 25°C; “HT” represents each isolate at 30°C.

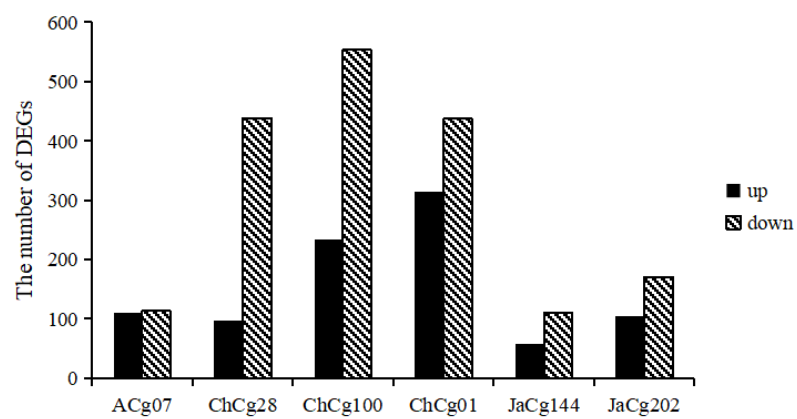

Figure S4. Up-regulation and down-regulation of genes in *Cenococcum geophilum* isolates
